# Supplementary material
Source: HighWire-hosted journal article supplement (https://jitc.bmj.com/content/8/2/e001071)
Supplement: inline-supplementary-material-8 [file inline-supplementary-material-8.xlsx]

## Sheet: Gene_set_enrichmentAnalysis
Supplementary Table 3. Enrichment analysis.
GO Biological Processes
Term	Overlap	P-value		Adjusted P-value	Z-score	Combined Score	Genes
glycolytic process (GO:0006096)	1944-05-01	8.08e-10		2.81e-07	-2.33	35.08	TPI1;PKM;ENO1;ALDOA;GAPDH
pyruvate metabolic process (GO:0006090)	1971-05-01	9.51e-09		1.66e-06	-2.14	28.43	TPI1;PKM;ENO1;ALDOA;GAPDH
monosaccharide metabolic process (GO:0005996)	6/221	8.04e-08		8.26e-06	-2.33	27.25	UGDH;TPI1;PKM;ENO1;ALDOA;GAPDH
single-organism carbohydrate catabolic process (GO:0044724)	5/113	9.97e-08		8.26e-06	-2.23	26.14	TPI1;PKM;ENO1;ALDOA;GAPDH
carbohydrate catabolic process (GO:0016052)	5/120	1.35e-07		8.26e-06	-2.24	26.22	TPI1;PKM;ENO1;ALDOA;GAPDH
gluconeogenesis (GO:0006094)	1946-04-01	1.42e-07		8.26e-06	-2.35	27.45	TPI1;ENO1;ALDOA;GAPDH
hexose biosynthetic process (GO:0019319)	1950-04-01	2e-07		9.96e-06	-2.21	25.51	TPI1;ENO1;ALDOA;GAPDH
monosaccharide biosynthetic process (GO:0046364)	1956-04-01	3.18e-07		1.38e-05	-2.17	24.25	TPI1;ENO1;ALDOA;GAPDH
glucose metabolic process (GO:0006006)	5/149	3.97e-07		1.53e-05	-2.24	24.87	TPI1;PKM;ENO1;ALDOA;GAPDH
hexose metabolic process (GO:0019318)	5/187	1.22e-06		4.25e-05	-2.3	23.16	TPI1;PKM;ENO1;ALDOA;GAPDH
Humancyc 2016
Term	Overlap	P-value		Adjusted P-value	Z-score	Combined Score	Genes
glycolysis_Homo sapiens_PWY66-400	2024-05-01	5.29e-11		6.88e-10	-1.71	36.05	TPI1;PKM;ENO1;ALDOA;GAPDH
superpathway of conversion of glucose to acetyl CoA and entry into the TCA cycle_Homo sapiens_PWY66-407	1946-05-01	1.68e-09		1.09e-08	-1.66	30.5	TPI1;PKM;ENO1;ALDOA;GAPDH
gluconeogenesis_Homo sapiens_PWY66-399	2024-04-01	1.39e-08		6.03e-08	-1.27	21.11	TPI1;ENO1;ALDOA;GAPDH
sucrose degradation_Homo sapiens_PWY66-373	2020-08-02	3.53e-05		0.000115	-0.02	0.19	TPI1;ALDOA
KEGG 2016
Term	Overlap	P-value		Adjusted P-value	Z-score	Combined Score	Genes
Glycolysis / Gluconeogenesis_Homo sapiens_hsa00010	1967-05-01	1.16e-08		6.08e-07	-2.04	29.2	TPI1;PKM;ENO1;ALDOA;GAPDH
Biosynthesis of amino acids_Homo sapiens_hsa01230	1974-05-01	1.93e-08		6.08e-07	-1.74	24.89	TPI1;PKM;ENO1;ALDOA;GAPDH
Carbon metabolism_Homo sapiens_hsa01200	5/113	1.63e-07		3.43e-06	-1.66	20.89	TPI1;PKM;ENO1;ALDOA;GAPDH
Metabolic pathways_Homo sapiens_hsa01100	8/1239	4.5e-05		0.000566	-1.91	14.3	ATP5B;UGDH;TPI1;PKM;IMPDH2;ENO1;ALDOA;GAPDH
Pathogenic Escherichia coli infection_Homo sapiens_hsa05130	1955-03-01	3.35e-05		0.000528	-1.74	13.13	TUBB;ACTB;ACTG1
HIF-1 signaling pathway_Homo sapiens_hsa04066	3/103	0.000218		0.00229	-1.71	10.39	ENO1;ALDOA;GAPDH
Phagosome_Homo sapiens_hsa04145	3/154	0.000708		0.00558	-1.54	7.98	TUBB;ACTB;ACTG1
Fructose and mannose metabolism_Homo sapiens_hsa00051	1932-02-01	0.000614		0.00553	-1.29	6.73	TPI1;ALDOA
NCI-Nature 2016
Term	Overlap	P-value		Adjusted P-value	Z-score	Combined Score	Genes
HIF-1-alpha transcription factor network_Homo sapiens_20ef2b81-6193-11e5-8ac5-06603eb7f303	1966-03-01	5.8e-05		0.000464	-1.45	11.13	PKM;ENO1;ALDOA
Signaling mediated by p38-alpha and p38-beta_Homo sapiens_e9dd8c21-6195-11e5-8ac5-06603eb7f303	1938-02-01	0.000867		0.00347	-1.68	9.5	KRT19;KRT8
Panther 2016
Term	Overlap	P-value		Adjusted P-value	Z-score	Combined Score	Genes
Glycolysis_Homo sapiens_P00024	2017-05-01	7.74e-12		1.08e-10	-1.29	29.64	TPI1;PKM;ENO1;ALDOA;GAPDH
Huntington disease_Homo sapiens_P00029	4/124	1.14e-05		7.96e-05	-1.56	14.68	TUBB;GAPDH;ACTB;ACTG1
Cytoskeletal regulation by Rho GTPase_Homo sapiens_P00016	1970-03-01	6.92e-05		0.000323	-1.25	10.04	TUBB;ACTB;ACTG1
Reactome 2016
Term	Overlap	P-value		Adjusted P-value	Z-score	Combined Score	Genes
Glycolysis_Homo sapiens_R-HSA-70171	1932-05-01	2.49e-10		6.25e-08	-2.41	39.94	TPI1;PKM;ENO1;ALDOA;GAPDH
Glucose metabolism_Homo sapiens_R-HSA-70326	1979-05-01	2.69e-08		3.38e-06	-2.03	25.59	TPI1;PKM;ENO1;ALDOA;GAPDH
Gluconeogenesis_Homo sapiens_R-HSA-70263	1932-04-01	4.68e-08		3.91e-06	-2.04	25.44	TPI1;ENO1;ALDOA;GAPDH
Metabolism of carbohydrates_Homo sapiens_R-HSA-71387	6/282	6.15e-07		3.86e-05	-2.22	22.54	TPI1;PKM;HS3ST5;ENO1;ALDOA;GAPDH
Metabolism_Homo sapiens_R-HSA-1430728	1908-10-01	2.18e-05		0.00078	-2.2	15.72	UGDH;ATP5B;TPI1;PKM;PSMC6;IMPDH2;HS3ST5;ENO1;ALDOA;GAPDH
mRNA Splicing_Homo sapiens_R-HSA-72172	4/144	2.05e-05		0.00078	-1.97	14.11	HNRNPL;HSPA8;HNRNPH1;PCBP1
mRNA Splicing - Major Pathway_Homo sapiens_R-HSA-72163	4/134	1.55e-05		0.000776	-1.96	14.01	HNRNPL;HSPA8;HNRNPH1;PCBP1
Processing of Capped Intron-Containing Pre-mRNA_Homo sapiens_R-HSA-72203	4/193	6.45e-05		0.0018	-2.09	13.23	HNRNPL;HSPA8;HNRNPH1;PCBP1
Folding of actin by CCT/TriC_Homo sapiens_R-HSA-390450	2020-10-02	5.66e-05		0.00178	-1.46	9.23	CCT2;ACTB
Prefoldin mediated transfer of substrate to CCT/TriC_Homo sapiens_R-HSA-389957	2027-02-01	0.000436		0.011	-2.04	9.19	CCT2;ACTB
WikiPathways 2016
Term	Overlap	P-value		Adjusted P-value	Z-score	Combined Score	Genes
Glycolysis and Gluconeogenesis_Mus musculus_WP157	1948-05-01	2.09e-09		6.06e-08	-1.94	32.31	TPI1;PKM;ENO1;ALDOA;GAPDH
Glycolysis and Gluconeogenesis_Homo sapiens_WP534	1949-05-01	2.33e-09		6.06e-08	-1.94	32.26	TPI1;PKM;ENO1;ALDOA;GAPDH
Pathogenic Escherichia coli infection_Homo sapiens_WP2272	1955-03-01	3.35e-05		0.000581	-1.91	14.25	TUBB;ACTB;ACTG1
Parkin-Ubiquitin Proteasomal System pathway_Homo sapiens_WP2359	1970-03-01	6.92e-05		0.000899	-1.85	13	HSPA8;PSMC6;TUBB
Cori Cycle_Homo sapiens_WP1946	2016-02-01	0.00015		0.00156	-1.74	11.24	TPI1;GAPDH
Striated Muscle Contraction_Homo sapiens_WP383	1938-02-01	0.000867		0.00688	-1.67	8.31	VIM;ACTG1
Disease Perturbations from GEO up
Term	Overlap	P-value	Adjusted P-value		Z-score	Combined Score	Genes
pancreatic cancer DOID-1793 human GSE16515 sample 475	15/376	4.2e-21	2.46e-18		-1.83	74.3	CCT2;HSPA8;TPI1;ANXA4;TUBB;KRT8;ENO1;ACTB;ACTG1;ATP5B;KRT19;PKM;VIM;ALDOA;GAPDH
Pseudomonas Infection C0033817 human GSE923 sample 170	14/361	2.14e-19	6.28e-17		-1.77	65.93	CCT2;HSPA8;ANXA4;TUBB;KRT8;ENO1;ACTB;ACTG1;ATP5B;PKM;HNRNPH1;PCBP1;ALDOA;GAPDH
Vulvar intraepithelial tumor UMLS CUI-C0346210 human GSE5563 sample 967	12/330	3.83e-16	6.74e-14		-1.77	53.6	CCT2;HSPA8;PSMC6;TPI1;PKM;HNRNPH1;TUBB;ENO1;ALDOA;GAPDH;ACTB;ACTG1
cervical cancer DOID-4362 human GSE9750 sample 619	12/335	4.59e-16	6.74e-14		-1.75	52.95	CCT2;ATP5B;KRT19;TPI1;PKM;TUBB;KRT8;ENO1;ALDOA;GAPDH;ACTB;ACTG1
salivary gland adenoid cystic carcinoma DOID-4866 human GSE36820 sample 511	12/351	8.05e-16	9.45e-14		-1.74	52.16	CCT2;KRT19;TPI1;PKM;TUBB;IMPDH2;VIM;ENO1;ALDOA;GAPDH;ACTB;ACTG1
head and neck squamous cell carcinoma 5520 human GSE6631 sample 458	12/363	1.21e-15	1.18e-13		-1.77	52.63	CCT2;HSPA8;KRT19;PKM;PCBP1;TUBB;KRT8;ENO1;ALDOA;GAPDH;ACTB;ACTG1
Asthma, allergic C0155877 human GSE3004 sample 360	12/383	2.29e-15	1.92e-13		-1.76	51.59	UGDH;CCT2;HSPA8;TPI1;HNRNPH1;PCBP1;KRT8;ENO1;ALDOA;GAPDH;ACTB;ACTG1
Malignant Melanoma C0025202 human GSE3189 sample 117	11/350	4.52e-14	3.32e-12		-1.75	46.35	HSPA8;TPI1;PKM;PCBP1;TUBB;VIM;ENO1;ALDOA;GAPDH;ACTB;ACTG1
pancreatic ductal adenocarcinoma DOID-3498 mouse GSE53659 sample 699	12/499	5.38e-14	3.51e-12		-1.89	49.95	ATP5B;HSPA8;KRT19;TPI1;PKM;PCBP1;KRT8;VIM;ALDOA;GAPDH;ACTB;ACTG1
Malignant mesothelioma of pleura C0812413 human GSE2549 sample 118	11/397	1.79e-13	1.05e-11		-1.79	45.21	ATP5B;KRT19;HNRNPH1;PCBP1;TUBB;VIM;ENO1;ALDOA;GAPDH;ACTB;ACTG1
Disease Perturbations from GEO down
Term	Overlap	P-value	Adjusted P-value		Z-score	Combined Score	Genes
Hepatocellular carcinoma DOID-684 human GSE10393 sample 493	14/298	1.42e-20	7.66e-18		-1.72	67.6	CCT2;HSPA8;TPI1;TUBB;KRT8;ENO1;ACTB;ACTG1;ATP5B;KRT19;PSMC6;VIM;ALDOA;GAPDH
Cardiac Hypertrophy C1383860 rat GSE1055 sample 354	13/467	4.81e-16	1.3e-13		-1.64	48.78	CCT2;TPI1;ENO1;ACTB;ACTG1;HNRNPL;ATP5B;PKM;HNRNPH1;PCBP1;VIM;ALDOA;GAPDH
hepatitis C DOID-1883 human GSE20948 sample 600	11/307	1.07e-14	1.93e-12		-1.68	45.35	UGDH;HSPA8;PSMC6;PKM;ANXA4;TUBB;KRT8;VIM;ALDOA;ACTB;ACTG1
LGLL - Large granular lymphocytic leukemia C1522378 human GSE10631 sample 47	10/225	2.68e-14	3.61e-12		-1.79	47.1	HSPA8;TPI1;PKM;PCBP1;TUBB;IMPDH2;VIM;ENO1;ALDOA;GAPDH
myotonic dystrophy type 1 DOID-11722 human GSE7179 sample 1050	10/239	4.91e-14	5.3e-12		-1.83	47.42	CCT2;KRT19;TPI1;PKM;HNRNPH1;TUBB;VIM;ENO1;ALDOA;GAPDH
Sjogren's syndrome DOID-12894 human GSE23117 sample 890	11/377	1.02e-13	9.18e-12		-1.6	40.69	HSPA8;ATP5B;KRT19;TPI1;TUBB;IMPDH2;KRT8;ENO1;ALDOA;GAPDH;ACTG1
Breast cancer DOID-1612 mouse GSE24594 sample 616	10/358	2.77e-12	2.14e-10		-1.63	36.32	HNRNPL;KRT19;TPI1;PKM;PCBP1;ANXA4;KRT8;VIM;ALDOA;GAPDH
hepatitis C DOID-1883 human GSE20948 sample 601	9/294	1.94e-11	1.31e-09		-1.68	34.28	CCT2;HSPA8;PSMC6;PKM;ANXA4;TUBB;VIM;ALDOA;GAPDH
hepatitis C DOID-1883 human GSE20948 sample 599	9/305	2.69e-11	1.61e-09		-1.68	33.91	KRT19;PSMC6;PKM;TUBB;KRT8;VIM;ALDOA;ACTB;ACTG1
diffuse large B-cell lymphoma DOID-0050745 mouse GSE6136 sample 688	9/337	6.54e-11	3.53e-09		-1.72	33.4	CCT2;HSPA8;TPI1;PKM;PCBP1;IMPDH2;ALDOA;GAPDH;ACTG1
Transcription Factor PPIs
Term	Overlap	P-value	Adjusted P-value		Z-score	Combined Score	Genes
ATF2	12/237	6.99e-18	3.84e-16		-1.83	64.9	ATP5B;CCT2;PKM;TPI1;TUBB;PCBP1;FUBP1;KRT8;VIM;ENO1;ALDOA;GAPDH
ESR1	13/871	1.42e-12	3.9e-11		-1.84	44.08	HSPA8;TUBB;KRT8;ENO1;ACTB;HNRNPL;UGDH;ATP5B;KRT19;PSMC6;PCBP1;ALDOA;GAPDH
ERG	1941-04-01	1.31e-07	2.4e-06		-1.35	17.43	HSPA8;PCBP1;TUBB;ACTB
MYC	9/957	5.64e-07	7.75e-06		-1.76	20.68	CCT2;HSPA8;PSMC6;PKM;PCBP1;TUBB;ALDOA;ACTB;ACTG1
POU5F1	6/338	1.77e-06	1.94e-05		-1.74	18.87	HNRNPL;CCT2;KRT19;PKM;GAPDH;ACTG1
NFKB1	5/254	8.86e-06	8.13e-05		-1.72	16.18	HSPA8;ANXA4;TUBB;VIM;ACTG1
HTT	5/293	1.77e-05	0.00014		-1.6	14.25	HSPA8;TUBB;ENO1;ALDOA;GAPDH
SP1	4/263	0.000213	0.00146		-1.76	11.51	HSPA8;TPI1;VIM;ACTG1
BHLHE40	2026-02-01	0.000404	0.00247		-0.94	5.66	VIM;ENO1
Gene-set enrichment analysis on the 23 genes coding for the 32 antigens recognized by at least three patients after two CT rounds.
